# Supplementary material
Source: PubMed Central journal article supplement (PMC10355165)
Supplement: NIHMS1914250-supplement-1.pdf [file NIHMS1914250-supplement-1.pdf]

### Supplemental Information

**Table S1.** Standardized neuropsychological assessment results for patient, individuals with ASD, and healthy controls.

|                                 | <b>Patient</b><br>(N=1) | <b>ASD</b><br>(N=6) | <b>Controls</b><br>(N=6) |
|---------------------------------|-------------------------|---------------------|--------------------------|
| Trails A Completion Time (sec)  | 38.00                   | 35.11 (9.06)        | 22.31 (5.60)             |
| Trails B Completion Time (sec)  | 109.00                  | 71.83 (16.32)       | 43.15 (11.41)            |
| Finger Tapping                  |                         |                     |                          |
| Dominant Hand Reaction Time     | 58.67                   | 44.20 (6.35)        | 42.74 (7.36)             |
| Non-dominant Hand Reaction Time | 44.00                   | 41.80 (7.21)        | 39.83 (4.76)             |
| Grooved Pegboard                |                         |                     |                          |
| Dominant Hand Reaction Time     | 115.00                  | 101.07 (42.33)      | 64.55 (8.75)             |
| Non-dominant Hand Reaction Time | 143.00                  | 93.74 (26.51)       | 68.49 (11.82)            |
| Annett Handedness Total Score   | 11.00                   | 6.50 (7.29)         | 10.50 (2.81)             |

Scores are reported as mean (SD). sec, seconds. For the Annett Handedness total score, a higher score indicates more right handed.
